# Supplementary material for: Performance Impacts of Innovation Outcomes in Entrepreneurial New Ventures
Source: publisher site journal article supplement (doi:10.1515/erj-2020-0342), 2021-07-01
Supplement: Supplementary file 1 [file j_erj-2020-0342_suppl_002.docx]

| **Message from your editor, Anahid** |
| --- |
| Dear Author,  It was a pleasure working on your document. Do go through my changes and comments in the edited file.  Please send me your feedback or any questions through your account ([en.wileyeditingservices.com](https://en.wileyeditingservices.com/)). |

| **Notes that I was unable to insert in your manuscript** |
| --- |

**Formatting**

- Note that most style guides discourage the use of italics for emphasis in academic prose because most often the unadorned words do the job without typographic assistance. As such, I have removed italicisation except when terms are referred within the manuscript as keywords, or when a non-English term (e.g., *raison d’être*) is employed.
- As the in-text citations have been automatically generated, I was unable to edit them individually. Please ensure they meet basic formatting requirements (i.e., alphabetised, appropriate punctuation). Importantly, please ensure removal of parentheses when authors are mentioned in-text, leaving only citation year in parentheses. Please also ensure removal of ‘e.g.’, which appears within some citations.
- I have kept the spelling of Ten Types of Innovation consistent with the most used spelling in the academic literature, i.e., capitalised and without use of quotations.

| **Editor’s report** |
| --- |
| I have provided feedback on your manuscript through specific comments along with ratings for relevant sections. The key below the table explains my ratings. I hope you find my feedback useful. |

| Section | Rating |
| --- | --- |
| **Title**  An effective title is concise while being representative. | ★★★ |
| **Abstract**  A good abstract explains the aims of the research, how these were met, and the main findings. | ★★★ |
| **Introduction & conceptual background**  This section should set the context for the study, clearly state the research objective, and establish the significance of the study. | ★★★ |
| **Data and methods**  This section should completely describe all methods, techniques, and instruments used. This includes ethical considerations. | ★★ |
| **Results & discussion**  These sections should present the data and findings in a clear and unbiased manner, and address the objective or research question stated in the introduction. A good concluding section notes the limitations of the study. It should mention the scope for further research as well as the implications/application of the study. | ★★ |

| ★★★ This section required only a few revisions.  ★★ Most parts of this section required revision.  ★ The entire section required significant revision. Please go through my comments/changes carefully. |
| --- |

| **Comments** |
| --- |
| **NOVELTY OF THE STUDY**  The study’s contribution to existing research is clearly highlighted.  **RELEVANCE AND CONTRIBUTION OF THE STUDY**  The topic is especially relevant today as it identifies for new entrepreneurial ventures the innovation pathways that lead to higher performance across a broad performance spectrum. The study’s model therefore allows these ventures to optimise limited resources while predicting, based on their specific innovation, the performance area(s) in which their venture is most likely to excel.  **SUBMISSION READINESS**  To enhance the submission readiness of your paper, I have made or recommend that you make the following revisions:   - I have edited for grammar, clarity, flow, and conciseness. - Note that the tone of the manuscript throughout was somewhat ‘familiar’ for an academic study.   e.g.,  “..in the first part of the analysis, when evaluating the performance impact of the three innovation categories, **it came out that** while innovation in all categories is needed to capture the wide array of all performance dimensions…”  I have therefore edited for tone and associated vocabulary. Please check that edits have retained your intended meaning and please continue to focus on a more academic tone/vocabulary as you refine the manuscript.   - Some language redundancy has been removed, resulting in a word count reduction of roughly 5%. - Please check my more extensive edits to ensure your intended meaning was retained, as indicated. Please also review any specific comments/questions I have included within the text and restate ambiguous statements, as indicated. - The Data and Methods section is quite lengthy and requires further content editing, especially the sub-section on Sampling & data collection. Please consider how methods can be communicated more concisely or whether details can be moved from the text to new tables or figures. An ‘Ethical considerations’ subsection should be added that provides information on ethical approval for your study and informed consent of you participants. - Consistent with the previous point, the Results section is also lengthy and contains sections of redundant wording. Please consider a more efficient way of communicating similar types of results or perhaps by referring more frequently to results in tables. - The Discussion clearly highlights theoretical and practical implications, study limitations and avenues for future research. |
| **Quick tip** |
| **Guideline** |
| Subject/verb agreement |
| **Explanation** |
| When the **subject** of the sentence is composed of two or more nouns or pronouns connected by and, use a plural **verb**. |
| **Example** |
| INCORRECT:  **“Entrepreneurial innovation and its link to performance is** attracting increasing attention among academics, entrepreneurs, and innovators alike.”  CORRECT:  “**Entrepreneurial innovation and its link to performance are** attracting increasing attention among academics, entrepreneurs, and innovators alike.” |
